# Supplementary material for: Real-World Study: Hybrid Immunity against SARS-CoV-2 Influences the Antibody Levels and Persistency Lasting More than One Year
Source: MDPI journal article supplement (doi:10.3390/vaccines11111693), 2023-11-07

## Supplementary information

**Table S1.** Binding antibody levels of participants who have received 2, 3, 4, or  $\geq 5$  doses, categorized by the duration since the last vaccination and vaccination plus infection.

|                               | (1)<br><6         | (2)<br>6 to <9   | (3)<br>9 to <12  | (4)<br>$\geq 12$ |
|-------------------------------|-------------------|------------------|------------------|------------------|
| <b>N<sub>pos</sub> groups</b> |                   |                  |                  |                  |
| 2 doses, n                    | 2                 | 2                | 7                | 16               |
| GMT                           | 24924.9           | 10615.3          | 1733.2           | 2642.7           |
| [95%CI]                       |                   |                  | [506.0–5936.8]   | [870.4–8023.3]   |
| 3 doses, n                    | 9                 | 17               | 32               | 43               |
| GMT                           | 10349.5           | 7142.2           | 5425.7           | 5965.7           |
| [95%CI]                       | [5795.0–8483.7]   | [4957.0–10290.7] | [4280.1–6877.9]  | [4574.3–7780.4]  |
| 4 doses, n                    | 31                | 62               | 91               | 74               |
| GMT                           | 8044.8            | 10483.7          | 6737.7           | 5847.9           |
| [95%CI]                       | [5671.5–11411.3]  | [8737.9–12578.2] | [5734.3–7916.7]  | [4909.7–6965.4]  |
| $\geq 5$ doses, n             | 38                | 52               | 72               | 5                |
| GMT                           | 15934.0           | 10988.4          | 8613.7           | 10361.8          |
| [95%CI]                       | [13803.9–18392.9] | [8927.5–13525.0] | [7352.7–10090.9] | [4084.7–26285.7] |
| Overall, n                    | 80                | 133              | 202              | 138              |
| GMT                           | 11778.4           | 10168.9          | 6779.6           | 5479.1           |
| [95%CI]                       | [9900.8–14012.1]  | [8970.9–11526.9] | [6066.5–7576.4]  | [4590.4–6539.8]  |
| <b>N<sub>neg</sub> groups</b> |                   |                  |                  |                  |
| 2 doses, n                    | N/A               | N/A              | N/A              | 2                |
| GMT                           |                   |                  |                  | 119.1            |
| [95%CI]                       |                   |                  |                  |                  |
| 3 doses, n                    | N/A               | 1                | 5                | 27               |
| GMT                           |                   | 1460.0           | 2820.9           | 1078.2           |
| [95%CI]                       |                   |                  | [927.7–8577.8]   | [791.9–1468.0]   |
| 4 doses, n                    | N/A               | 16               | 50               | 42               |
| GMT                           |                   | 4175.2           | 2266.5           | 1889.3           |
| [95%CI]                       |                   | [2783.6–6262.4]  | [1811.0–2836.5]  | [1575.5–2265.5]  |
| $\geq 5$ doses, n             | 8                 | 30               | 35               | 2                |
| GMT                           | 10578.5           | 4433.2           | 3272.5           | 1184.5           |
| [95%CI]                       | [5928.6–18875.4]  | [3270.0–6010.1]  | [2626.3–4077.8]  |                  |
| Overall, n                    | 8                 | 47               | 90               | 73               |
| GMT                           | 10578.5           | 4242.2           | 2646.5           | 1405.3           |
| [95%CI]                       | [5928.6–18875.4]  | [3358.1–5359.0]  | [2260.3–3098.7]  | [1151.0–1715.7]  |

The duration of the last vaccination and vaccination plus infection is categorized as follows: (1) <6 months, (2) 6 to <9 months, (3) 9 to <12 months, and (4)  $\geq 12$  months.

Abbreviations: 95%CI, 95% confidence intervals; GMT, geometric mean titer in U/mL; n, number; N<sub>neg</sub>, the seronegative of total anti-N Ig; N<sub>pos</sub>, the seropositive of total anti-N Ig; N/A, no available.

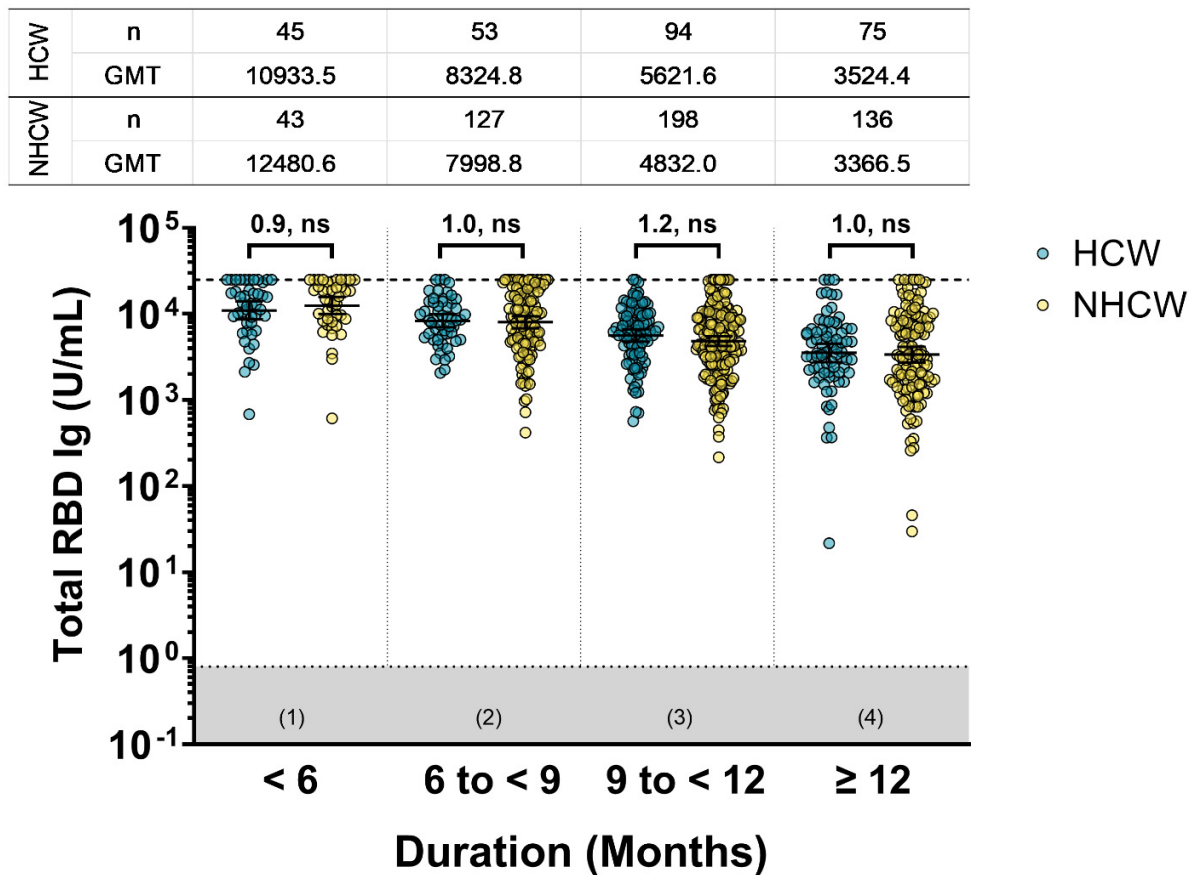

Supplement: s1 [file s1]
